# Supplementary material
Source: publisher site journal article supplement (https://www.dovepress.com/article/226425)
Supplement: Supplementary file 1 [file get_supplementary_file.php]

**Table S1: Ethics Committees (EC)**

| <b>UNITED KINGDOM</b>                                            |
|------------------------------------------------------------------|
| <b>Name of EC</b>                                                |
| NHS Health Research Authority                                    |
| Office for Research Ethics Committee Northern Ireland (ORECNI)   |
| <b>GERMANY</b>                                                   |
| <b>Name of EC</b>                                                |
| Ethikkommission Universität Tübingen                             |
| Landesärztekammer Rheinland-Pfalz                                |
| Ethikkommission der Universitätsmedizin Göttingen                |
| Ethikkommission Med. Fakultät, Universität Würzburg              |
| Ethikkommission Med. Fakultät, HHU Düsseldorf                    |
| Ärztekammer Westfalen-Lippe                                      |
| <b>REPUBLIC OF IRELAND</b>                                       |
| <b>Name of EC</b>                                                |
| University Hospital Waterford Research Ethics Office             |
| <b>CANADA</b>                                                    |
| <b>Name of EC</b>                                                |
| CIRBI (Centre for IRB Intelligence)* - a central IRB institution |

**Table S2** Eligibility criteria for the GA and non-GA groups in a cross-sectional study conducted in 17 sites in the United Kingdom, Germany, Ireland, and Canada

| <b>GA group</b>                                |                                                                                | <b>Non-GA group</b>                                                                                                                                                                                                                                                       |                                                                                |
|------------------------------------------------|--------------------------------------------------------------------------------|---------------------------------------------------------------------------------------------------------------------------------------------------------------------------------------------------------------------------------------------------------------------------|--------------------------------------------------------------------------------|
| <b>Inclusion criteria</b>                      | <b>Exclusion criteria</b>                                                      | <b>Inclusion criteria</b>                                                                                                                                                                                                                                                 | <b>Exclusion criteria</b>                                                      |
| Bilateral symptomatic GA (physician confirmed) | Participated in an interventional study ≤12 months before study inclusion date | Had no ophthalmic condition that in the opinion of the investigator affected visual function. Conditions allowed in the study included (but were not limited to):<br>early/intermediate AMD, dry eye, choroidal nevus, epiretinal membrane, a history of cataract surgery | Participated in an interventional study ≤12 months before study inclusion date |
| Aged ≥70 years at study inclusion              | Participated in the Genentech, Inc. Mahalo study (NCT01229215)                 | Aged ≥70 years at study inclusion                                                                                                                                                                                                                                         | History of GA, CNV, DME, and/or RVO                                            |

|                                                                                                   |                                                                                                                                                                     |                                                                                                   |                                                                                                                                                                     |
|---------------------------------------------------------------------------------------------------|---------------------------------------------------------------------------------------------------------------------------------------------------------------------|---------------------------------------------------------------------------------------------------|---------------------------------------------------------------------------------------------------------------------------------------------------------------------|
| Provided informed consent <sup>a</sup><br>allowing contribution of patient<br>data into the study | Participating in the Roche Chroma<br>(NCT02247479), Spectri<br>(NCT02247531), Proxima A<br>(NCT02479386), or Proxima B<br>(NCT02399072) trials                      | Provided informed consent <sup>a</sup><br>allowing contribution of patient<br>data into the study | Decreased cognitive function such<br>that the patient was unable to<br>understand the interview at time of<br>visit (in the opinion of<br>physician/research nurse) |
|                                                                                                   | History of CNV, DME, and/or RVO                                                                                                                                     |                                                                                                   |                                                                                                                                                                     |
|                                                                                                   | Decreased cognitive function such<br>that the patient was unable to<br>understand the interview at time of<br>visit (in the opinion of<br>physician/research nurse) |                                                                                                   |                                                                                                                                                                     |

**Note:** <sup>a</sup>No identifiable information is reported in this study. Patients consented for their data to be used in this study, including completion of patient questionnaires. Patients were given the option to also provide additional consent for their data to be linked to other available electronic medical record data sources and agree to being contacted post study for follow-up, which was optional and dependent on gaining approval from ethics and other regulatory authorities in participating countries (not a consideration for this study, and separate documentation will be submitted).

**Abbreviations:** AMD, age-related macular degeneration; CNV, choroidal neovascularization; DME, diabetic macular edema; GA, geographic atrophy; RVO, retinal vein occlusion.

**Table S3** Sociodemographic, vision-specific, disease characteristic, and patient-reported outcome variables (GA and/or non-GA groups) in a cross-sectional study conducted in 17 sites in the United Kingdom, Germany, Ireland, and Canada

| <b>Variable</b>                                       | <b>Description</b>                                                                                                                                                                                                                                                                                              |
|-------------------------------------------------------|-----------------------------------------------------------------------------------------------------------------------------------------------------------------------------------------------------------------------------------------------------------------------------------------------------------------|
| <b>Sociodemographics (GA and non-GA groups)</b>       |                                                                                                                                                                                                                                                                                                                 |
| Age                                                   | Continuous ( $\geq 70$ years)                                                                                                                                                                                                                                                                                   |
| Sex                                                   | Male, female                                                                                                                                                                                                                                                                                                    |
| Ethnicity                                             | White, Asian, Chinese, Black/African/Caribbean, mixed, other                                                                                                                                                                                                                                                    |
| Marital status                                        | Single/never married, married/domestic partnership, divorced, widowed, separated                                                                                                                                                                                                                                |
| Living status                                         | At home alone, at home with family or friends, in an assisted living facility (private or public), in a nursing home/residential care home (private or public)                                                                                                                                                  |
| No. of people living in household, including patient  | Including number of people in household such as spouse, dependent children, and elderly parents                                                                                                                                                                                                                 |
| Highest level of education                            | Graduate degree (eg, master's degree, doctoral degree, or PhD), university or college degree, university or college qualification below a degree (eg, diploma), upper secondary school qualification (eg, A levels), lower secondary school qualification (eg, standard grade, intermediate), none of the above |
| Occupation                                            | Paid full-time, paid part-time, self-employed, voluntary work, homemaker, retired, unable to work                                                                                                                                                                                                               |
| Insurance status                                      | Insured or not insured                                                                                                                                                                                                                                                                                          |
| <b>Disease characteristics (GA and non-GA groups)</b> |                                                                                                                                                                                                                                                                                                                 |
| VA measures                                           | Measured $\pm 14$ days from date of study inclusion. Included type                                                                                                                                                                                                                                              |

---

(eg, ETDRS or Snellen) and distance (eg, 4 meters, 6 meters)

---

**Disease characteristics (GA group)**

---

Year of GA diagnosis                      The month and year of first affected eye and where applicable second affected eye

---

Tests at GA diagnosis                      Tests conducted  $\pm 14$  days from the date of GA diagnosis were recorded and included FAF, FFA, OCT, VA, color fundus photography, etc<sup>a</sup>

---

Condition of eyes                              Included fellow eye status, center foveal involvement, and lesion size

---

Lesion size                                      Measured  $\pm 14$  days from date of study inclusion. Based on broad categories (eg, 1 DD, 1–2 DD, 2–3 DD) and method of assessment (clinical examination, color fundus photograph, FFA image, FAF region finder, infrared image, OCT image, FAF image)

---

Central retinal thickness and macular volume (OCT)                      Measured  $\pm 14$  days from date of study inclusion. Date of measurement, center point thickness measurement, and macular volume (mm<sup>3</sup>)

---

Involvement of the fovea<sup>a</sup>                      Any foveal involvement, non-foveal involvement

---

Blindness                                        In the clinician's opinion, was the patient eligible to be registered as legally blind at the time of study inclusion: yes/no

---

**Disease characteristics (non-GA group)**

---

Reason for visit                                Early/intermediate AMD, dry eye, choroidal nevus, epiretinal membrane, history of cataract surgery, other

---

**Other clinical information (GA and non-GA groups)**

---

Comorbidities                                  Ocular and non-ocular comorbidities such as cataract, glaucoma, and diseases in Charlson Comorbidity Index such as diabetes<sup>a</sup>

---

---

**Interviewer-administered patient-reported outcomes (GA and non-GA groups)**

---

NEI-VFQ-25<sup>1,2</sup> Interviewer-administered disease-specific vision-related functioning and QoL questionnaire. Includes one item on general health and 25 items that comprise 11 vision-related subscales: near activities, distance activities, dependency, driving, general vision, ocular pain, social functioning, mental health, role difficulties, color vision, and peripheral vision. In this study, an additional six appendix items were included for the near activities and distance activities subscales. The composite score and subscale scores range from 0–100, with higher scores indicating better vision-related functioning

---

Global Rating of Change Scale<sup>3</sup> Paper-based questionnaire administered by the interviewer at the study inclusion visit. The patient was asked to assess their current vision status compared with a previous time point, and rate whether their vision had improved or deteriorated over the last year. The score was aggregated into the following categories: worse (–7 to –2), the same (–1 to +1), and better (+2 to +7)

---

**Disease characteristics (GA and non-GA groups)**

---

VA measures Measured  $\pm 14$  days from date of study inclusion. Included type (eg, ETDRS or Snellen) and distance (eg, 4 meters, 6 meters)

---

**Vision-specific details (GA group)**

---

Legally blind Yes (registered as legally blind in the applicable country), ongoing (currently going through the process for blindness classification and/or registration process pending completion), no

---

Driving license Yes, no

---

|                                                    |                                                                                                                                                                                                                                                                                                                                                                           |
|----------------------------------------------------|---------------------------------------------------------------------------------------------------------------------------------------------------------------------------------------------------------------------------------------------------------------------------------------------------------------------------------------------------------------------------|
| Driving confidence (day/night)                     | During the day (yes, no), during the night (yes, no)                                                                                                                                                                                                                                                                                                                      |
| Eye rehabilitation services used                   | Services used ≤24 months before study inclusion: none, low-vision clinics, physical/occupational therapist, support groups, other                                                                                                                                                                                                                                         |
| Vision-related equipment used                      | Equipment used ≤24 months before study inclusion: portable lighting, glasses, magnifiers, binoculars, reading aids (eg, electronic books, larger-print paper copies), independent living aids (eg, talking clock, talking remote control), computer and communication tools (eg, voice-activated phone, braille printer), cane/white cane/walking stick, guide dog, other |
| Transport regularly used                           | Do not use transport, drive own vehicle, public transport, taxi, travel with paid caregiver, travel with partner/friend                                                                                                                                                                                                                                                   |
| Adjustment(s) made to the patient's home due to GA | Yes, no (eg, bright lighting, installation of railings, installation of ramps)                                                                                                                                                                                                                                                                                            |
| Time off due to vision (if working)                | Days per month                                                                                                                                                                                                                                                                                                                                                            |
| Assistance with activities of daily living         | Yes receives assistance (unpaid assistance, paid assistance), no assistance required                                                                                                                                                                                                                                                                                      |
| Support/benefit from government                    | Yes, no (eg, disability benefit)                                                                                                                                                                                                                                                                                                                                          |
| Home health care services                          | Services used ≤24 months before study inclusion: community nurse/occupational therapist, counseling, support from charities, other                                                                                                                                                                                                                                        |
| Participation in support group(s)                  | Yes, no                                                                                                                                                                                                                                                                                                                                                                   |

**Note:** <sup>a</sup>Fovea is defined as a small area of the retina of ~1.5 mm in diameter situated within the macula lutea.

**Abbreviations:** AMD, age-related macular degeneration; DD, disk diameter; ETDRS, Early Treatment Diabetic Retinopathy Study; FAF, fundus autofluorescence; FFA, fundus fluorescein angiography; GA, geographic atrophy; NEI-VFQ-25, National Eye Institute Visual Function Questionnaire-25; OCT, optical coherence tomography; QoL, quality of life; VA, visual acuity.

**References:**

1. Sivaprasad S, Tschosik E, Kapre A, et al. Reliability and construct validity of the NEI VFQ-25 in a subset of patients with geographic atrophy from the phase 2 Mahalo study. *Am J Ophthalmol.* 2018;190:1–8.
2. Mangione CM, Lee PP, Gutierrez PR, Spritzer K, Berry S, Hays RD; National Eye Institute Visual Function Questionnaire Field Test Investigators. Development of the 25-item National Eye Institute Visual Function Questionnaire. *Arch Ophthalmol.* 2001;119(7):1050–1058.
3. Jaeschke R, Singer J, Guyatt GH. Measurement of health status. Ascertaining the minimal clinically important difference. *Control Clin Trials.* 1989;10(4):407–415.



**Table S4** Health care resource use variables for the GA group in a cross-sectional study conducted in 17 sites in the United Kingdom, Germany, Ireland, and Canada

| <b>Variable</b>                                         | <b>Operational definitions</b>                                                                                                                                                                       |
|---------------------------------------------------------|------------------------------------------------------------------------------------------------------------------------------------------------------------------------------------------------------|
| <b>Direct ophthalmologic resource use</b>               |                                                                                                                                                                                                      |
| Ophthalmological-related patient visits                 | Number of visits was recorded. Visits were identified as subspecialist, general ophthalmologist, or nurse/optometrist/other allied health care professional, and as first visit or subsequent visits |
| Ophthalmological tests or procedures                    | Number of tests was recorded. Tests included VA, OCT, FAF, FFA, eye pressure test, ophthalmoscopy, ICG angiography, microperimetry, cataract surgery, etc                                            |
| Drugs or other treatments related to eye disease        | Number of prescriptions/treatments was recorded and included prescriptions, over-the-counter vitamins, etc                                                                                           |
| <b>Indirect ophthalmologic resource use<sup>a</sup></b> |                                                                                                                                                                                                      |
| Treatment for falls and other medical occurrences       | Included care provided by physicians, hospital admissions, procedures/treatments including elective or emergency treatment, etc                                                                      |

**Note:** <sup>a</sup>Information on treatment for depression/anxiety was collected but not included in analysis due to minimal associated costs.

**Abbreviations:** FAF, fundus autofluorescence; FFA, fundus fluorescein angiography; GA, geographic atrophy; ICG, indocyanine green; OCT, optical coherence tomography; VA, visual acuity.

**Table S5** Visional functioning based on NEI-VFQ-25 subscales<sup>a</sup> – GA and non-GA groups in a cross-sectional study conducted in 17 sites in the United Kingdom, Germany, Ireland, and Canada

| Variable                                                               | GA group<br>(n=137) | Non-GA group<br>(n=52) | P-value |
|------------------------------------------------------------------------|---------------------|------------------------|---------|
| General health                                                         |                     |                        |         |
| Mean (SD)                                                              | 48.0 (24.5)         | 49.0 (25.7)            |         |
| [95% CI]                                                               | [43.9–52.1]         | [42.0–56.0]            |         |
| Median (IQR)                                                           | 50.0 (25.0–50.0)    | 50.0 (25.0–62.5)       |         |
| Missing                                                                | 1                   | 0                      |         |
| General health: in general would you say your overall health is, n (%) |                     |                        |         |
| Excellent                                                              | 11 (8.1)            | 5 (9.6)                |         |
| Very good                                                              | 20 (14.7)           | 8 (15.4)               |         |
| Good                                                                   | 59 (43.4)           | 22 (42.3)              |         |
| Fair                                                                   | 39 (28.7)           | 14 (26.9)              |         |
| Poor                                                                   | 7 (5.1)             | 3 (5.8)                |         |
| Missing                                                                | 1                   | 0                      |         |
| General vision                                                         |                     |                        |         |
| Mean (SD)                                                              | 45.9 (19.3)         | 78.5 (10.4)            |         |
| [95% CI]                                                               | [42.7–49.1]         | [75.7–81.3]            |         |
| Median (IQR)                                                           | 40.0 (40.0–60.0)    | 80.0 (80.0–80.0)       |         |
| Missing                                                                | 1                   | 0                      |         |

---

General vision: at the present time

would you say your eyesight using both

eyes is, n (%)

|                  |           |           |
|------------------|-----------|-----------|
| Excellent        | 0         | 5 (9.6)   |
| Good             | 17 (12.5) | 38 (73.1) |
| Fair             | 38 (27.9) | 9 (17.3)  |
| Poor             | 49 (36.0) | 0         |
| Very poor        | 32 (23.5) | 0         |
| Completely blind | 0         | 0         |
| Missing          | 1         | 0         |

Ocular pain

|              |                    |                    |                    |
|--------------|--------------------|--------------------|--------------------|
| Mean (SD)    | 86.6 (19.9)        | 92.8 (11.2)        | 0.173 <sup>b</sup> |
| Median (IQR) | 100.0 (75.0–100.0) | 100.0 (87.5–100.0) |                    |
| Missing      | 1                  | 0                  |                    |

Near activities

|              |                  |                  |                     |
|--------------|------------------|------------------|---------------------|
| Mean (SD)    | 25.6 (16.2)      | 46.4 (10.8)      | <0.001 <sup>b</sup> |
| Median (IQR) | 22.8 (13.8–38.4) | 46.8 (42.5–50.5) |                     |
| Missing      | 1                | 0                |                     |

Distance activities

|              |                  |                  |                     |
|--------------|------------------|------------------|---------------------|
| Mean (SD)    | 26.4 (16.7)      | 46.3 (10.8)      | <0.001 <sup>b</sup> |
| Median (IQR) | 25.4 (14.3–38.2) | 48.5 (42.3–50.5) |                     |
| Missing      | 1                | 0                |                     |

Social functioning

|              |                   |                    |                     |
|--------------|-------------------|--------------------|---------------------|
| Mean (SD)    | 64.7 (30.7)       | 98.6 (4.0)         | <0.001 <sup>b</sup> |
| Median (IQR) | 62.5 (43.8–100.0) | 00.0 (100.0–100.0) |                     |

---

|                          |                    |                    |                     |
|--------------------------|--------------------|--------------------|---------------------|
| Missing                  | 1                  | 0                  |                     |
| <b>Mental health</b>     |                    |                    |                     |
| Mean (SD)                | 53.1 (25.4)        | 91.6 (10.9)        | <0.001 <sup>b</sup> |
| Median (IQR)             | 56.3 (31.3–75.0)   | 93.8 (87.5–100.0)  |                     |
| Missing                  | 1                  | 0                  |                     |
| <b>Color vision</b>      |                    |                    |                     |
| Mean (SD)                | 78.9 (27.7)        | 99.0 (4.9)         |                     |
| Median (IQR)             | 100.0 (50.0–100.0) | 00.0 (100.0–100.0) |                     |
| Missing                  | 3                  | 0                  |                     |
| <b>Peripheral vision</b> |                    |                    |                     |
| Mean (SD)                | 62.8 (32.6)        | 98.1 (6.7)         |                     |
| Median (IQR)             | 50.0 (25.0–100.0)  | 00.0 (100.0–100.0) |                     |
| Missing                  | 6                  | 0                  |                     |

**Notes:** <sup>a</sup>Subscale scores range from 0–100, with higher scores indicating better vision-related functioning. <sup>b</sup>Because the parametric assumptions were not met (ie, equal group variance and distributions consistent with a normally distributed population), the comparison between groups was conducted using a Wilcoxon rank-sum test. Note: percentages, means, medians, and 95% CIs are based on non-missing values.

**Abbreviations:** GA, geographic atrophy; IQR, interquartile range; NEI-VFQ-25, National Eye Institute Visual Function Questionnaire-25.

**Table S6** Medical and nonmedical resource utilization in the GA group – costs associated with direct and indirect ophthalmologic resource use in a cross-sectional study conducted in 17 sites in the United Kingdom, Germany, Ireland, and Canada

| Variable                                                         | Costs per patient (GA group)<br>(N=137)<br>Annual |
|------------------------------------------------------------------|---------------------------------------------------|
| Direct ophthalmologic resource use (€), mean (SD) <sup>a</sup>   |                                                   |
| Patient visits <sup>b</sup>                                      | 188.3 (169.8)                                     |
| Tests or procedures                                              | 1070.9 (1294.6)                                   |
| Drugs/other treatments <sup>b</sup>                              | 116.4 (641.6)                                     |
| Eye rehabilitation services                                      | 14.4 (30.6)                                       |
| Home health care services                                        | 319.2 (2397.2)                                    |
| Vision-related equipment <sup>c</sup>                            | 62.9 (111.0)                                      |
| Mean total for direct cost (€)                                   | 1772.1                                            |
| Indirect ophthalmologic resource use (€), mean (SD) <sup>d</sup> |                                                   |
| GP (or equivalent) visits                                        | 176.6 (270.2)                                     |
| Visits to emergency department                                   | 11.9 (43.8)                                       |
| Inpatient admissions                                             | 38.6 (236.00)                                     |
| Outpatient admissions                                            | 6.9 (41.03)                                       |
| Mean total for indirect cost (€)                                 | 234                                               |
| Mean total for direct and indirect costs (€)                     | 2006.1                                            |

**Notes:** <sup>a</sup>For each patient, a cost was calculated for each test/procedure or treatment per period. Costs were adjusted if the patient had <24 months of history. The currency used to estimate costs was euros. The reference year for the unit cost was 2017 and the following 2017 average currency exchange rates were used: 1 British pound sterling = 1.1413 euros and 1 Canadian dollar = 0.6826 euros.

<sup>b</sup>The unit cost per prescription was defined as the mean cost of all available prescriptions for each treatment, regardless of use. For Canada, a cost per pill was collected for amoxicillin and because it is generally prescribed for depression with a long duration of treatment, costs for its use were calculated for 6 months of treatment with a posology of one pill per day.

<sup>c</sup>Only one piece of equipment per period was considered to calculate the cost of vision-related equipment. Because the cost of reading aids was very different between the United Kingdom and Germany, the cost collected in the United Kingdom was applied to Germany.

<sup>d</sup>For each patient, a cost was calculated for each type of visit and admission per period. For admissions, because the length of stay was not collected in the questionnaire, the unit cost (cost for 1 day) was applied for inpatient admissions. Costs for outpatient admissions were adjusted if the patient had <24 months of history. No adjustment of cost was applied on inpatient admissions. Treatment prescribed for falls/other medical occurrences or prescribed medication related to visits were not collected in eCRFs.

Note: means are based on non-missing values.

**Abbreviations:** eCRF, electronic case report form; GA, geographic atrophy; GP, general practitioner.
